# Supplementary material for: Crosstalk between nonclassical monocytes and alveolar macrophages mediates transplant ischemia-reperfusion injury through classical monocyte recruitment
Source: JCI journal article supplement (doi:10.1172/jci.insight.147282), 2021-02-28
Supplement: sd1 [file 1]

**Supplemental Figure 1. Allografts from donor administered with Clodronate liposomes have decreased recruitment of classical monocytes.** Intravital two-photon imaging at 2 hours through 2 hours and 30 minutes after reperfusion. (A) Representative still images of donor lungs from PBS-liposomes (PBS-lip) and Clodronate-liposomes (Clo-lip) treated allografts. Green, CCR2-GFP (recipient); red, dextran blood vessels. (B) CCR2-GFP cell density calculated using NIH ImageJ software in PBS-lip and Clo-lip injected mice. Data was analyzed by Unpaired Student's t-test. n.s: not significant; \*\* $p < 0.01$ .

**Supplemental Figure 2. Cells of donor and recipient origin in allograft 24 hours post-transplant.** Allogeneic lung transplant was performed using wild-type C57BL/6J CD45.2 as recipient and BALB/c CD45.1 as donor. Flow cytometry was performed in naïve lungs as well as in the allograft. Neutrophils were gated as live CD45<sup>+</sup>Ly6G<sup>+</sup>CD11b<sup>+</sup>CD24<sup>+</sup>SSC<sup>hi</sup>; Alveolar macrophages (AM) were gated as live CD45<sup>+</sup>Ly6G<sup>-</sup>NK1.1<sup>-</sup>SiglecF<sup>+</sup>CD64<sup>+</sup>CD11c<sup>+</sup>; Interstitial macrophages (IM) were gated as live CD45<sup>+</sup>Ly6G<sup>-</sup>NK1.1<sup>-</sup>CD11b<sup>+</sup>MHCII<sup>+</sup>CD11c<sup>+</sup>CD64<sup>+</sup>CD24<sup>-</sup>; Classical monocytes (CM) were gated as live CD45<sup>+</sup>Ly6G<sup>-</sup>NK1.1<sup>-</sup>CD11b<sup>+</sup>Siglec<sup>-</sup>CD24<sup>-</sup>Ly6C<sup>+</sup>; Non-classical monocytes (NCM) were gated as live CD45<sup>+</sup>Ly6G<sup>-</sup>NK1.1<sup>-</sup>CD11b<sup>+</sup>Siglec<sup>-</sup>CD24<sup>-</sup>Ly6C<sup>+</sup>.

**Supplemental Figure 3. RFP positive cells of donor origin in allograft 24 hours post-transplant.** Allogeneic lung transplant was performed using wild-type *Ccl2-rfp* as wild-type. Flow cytometry was performed to determine RFP positive cells. Figure shows representative gating of alveolar macrophages (AM; live CD45<sup>+</sup>Ly6G<sup>-</sup>NK1.1<sup>-</sup>SiglecF<sup>+</sup>CD64<sup>+</sup>CD11c<sup>+</sup>), interstitial macrophages (IM; live CD45<sup>+</sup>Ly6G<sup>-</sup>NK1.1<sup>-</sup>CD11b<sup>+</sup>MHCII<sup>+</sup>CD11c<sup>+</sup>CD64<sup>+</sup>CD24<sup>-</sup>) and non-classical monocytes (NCM; live CD45<sup>+</sup>Ly6G<sup>-</sup>NK1.1<sup>-</sup>CD11b<sup>+</sup>Siglec<sup>-</sup>CD24<sup>-</sup>Ly6C<sup>+</sup>) separated by RFP expression.

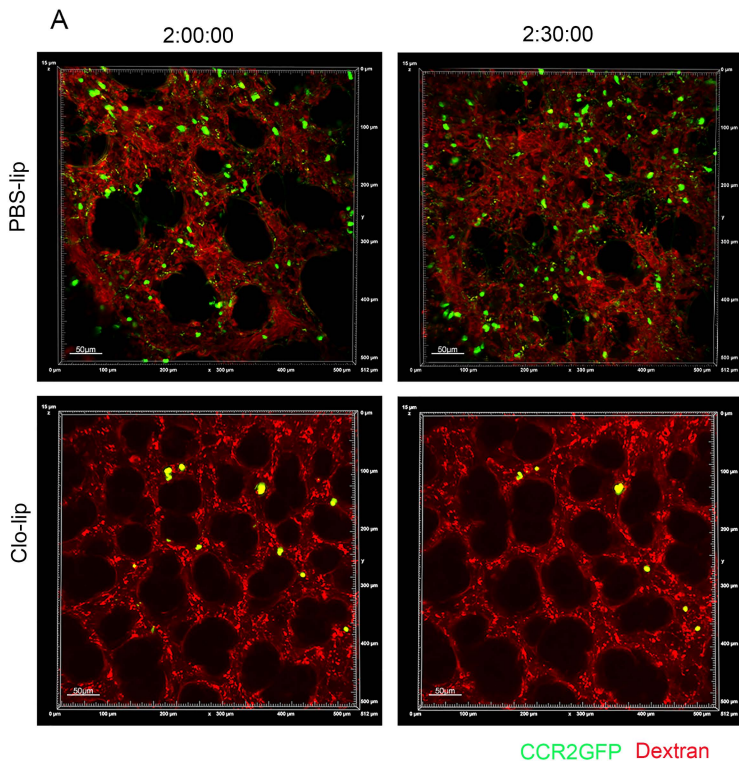

CCR2GFP Dextran

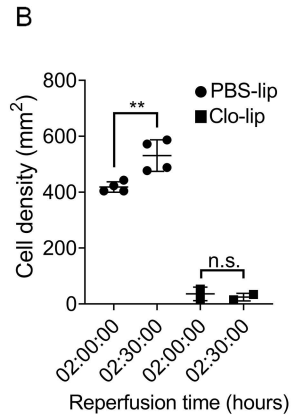

Supplemental Figure 1

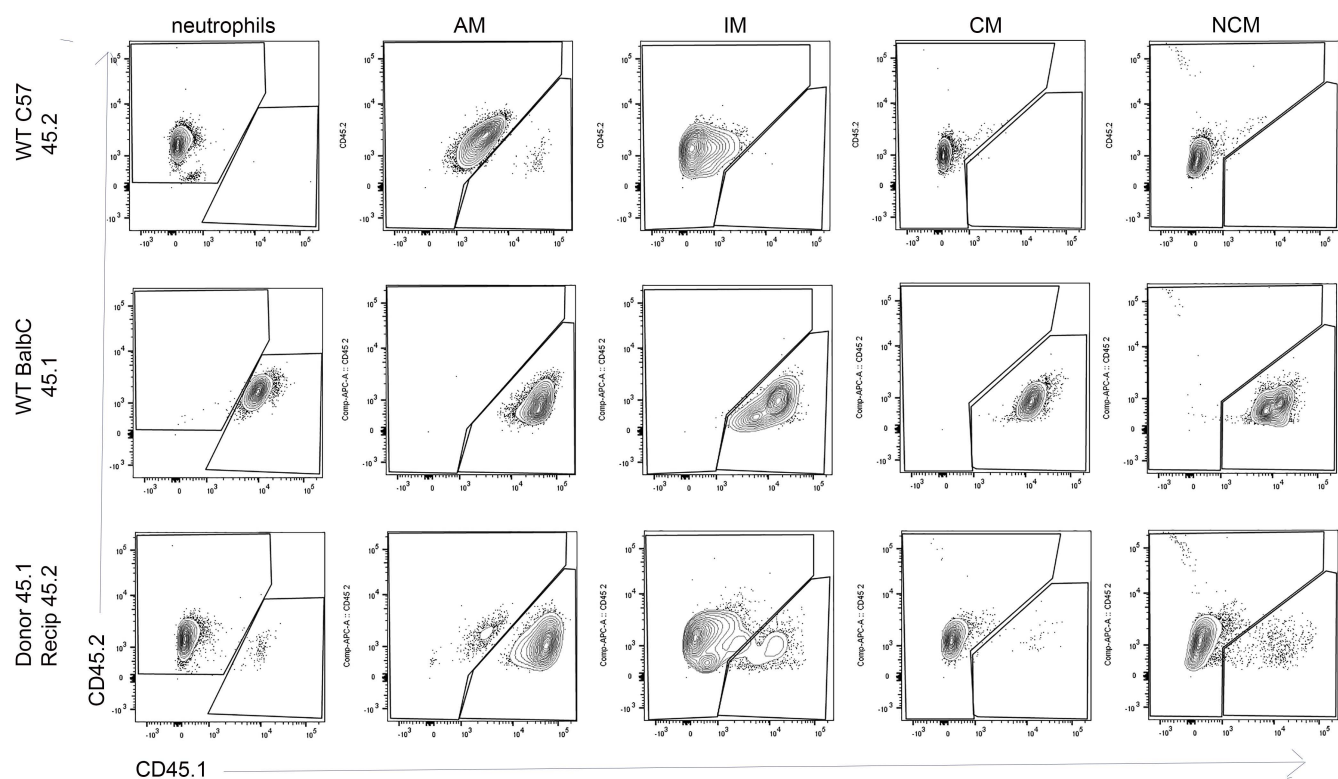

CD45.1

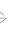

Supplemental Figure 2

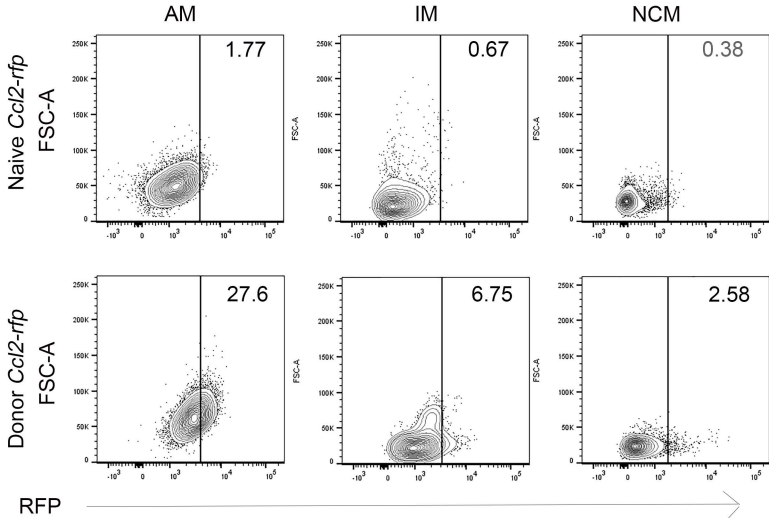

RFP

Supplemental Figure 3
